# Supplementary material
Source: publisher figshare collection journal article supplement (https://diabetesjournals.figshare.com/articles/dataset/_/20736553)
Supplement: Supplementary file 1 [file 1]

## **Supplementary Materials:**

1. Supplementary acknowledgement – KPMP
2. Supplementary methods
3. Supplementary references
4. Supplementary tables:
  - Table S1. Proteins associated with DKD progression.
  - Table S2. Association of plasma ANGPT2 (ELISA) with risk of outcome
  - Table S3. Association of plasma ANGPT2 with outcome, stratified by diabetes status, in the CHS cohort
  - Table S4. Association of plasma ANGPT2 with incident ESKD in CHS cohort, using time-to-event analysis
  - Table S5. ANG-TIE signaling pathway related genes from three database
  - Table S6. Basic clinical data of DKD patients included in the ScRNAseq analysis
5. Supplementary Figures:
  - Fig. S1. Curation of an unbiased ANG-TIE signaling gene set.
  - Fig. S2. Correlation matrix between the univariate significant plasma proteins and the lasso cross validation curve.
  - Fig. S3. Time-dependent ROC curve truncated at 5 years for clinical model and the joint clinical and biomarker model.
  - Fig. S4. Functional characterization of the ANG-TIE signaling network in the kidney.
  - Fig. S5. Association of tubular ANG-TIE signaling pathway score with plasma ANGPT2 level and kidney outcome (n=25).
  - Fig. S6. TEK gene expression in KPMP single cell data: DKD and living kidney donors (LD).

## Supplementary acknowledgement

### **For the Kidney Precision Medicine Project**

*American Association of Kidney Patients, Tampa, FL:* Richard Knight

*Beth Israel Deaconess, Boston, MA:* Stewart H. Lecker; Isaac Stillman

*Boston Cell Standards, Boston, MA:* Steve Bogen

*Boston University and Boston Medical Center, Boston, MA:* Afolarin A. Amodu; Titlayo Ilori; Shana Maikhor; Insa Schmidt, Laurence H. Beck; Joel M. Henderson; Ingrid Onul; Ashish Verma, Sushrut Waikar

*Brigham & Women's Hospital, Boston, MA:* Gearoid M. McMahon; M. Todd Valerius; Sushrut Waikar; Astrid Weins; Mia R. Colona

*Broad Institute, Cambridge, MA:* Anna Greka; Nir Hacohen; Paul J. Hoover; Jamie L. Marshall

*Case Western Reserve, Cleveland, OH:* Mark Aulisio; Yijiang M. Chen; Andrew Janowczyk; Catherine Jayapandian; Vidya S. Viswanathan; William S. Bush; Dana C. Crawford; Anant Madabhushi

*Cleveland Clinic, Cleveland, OH:* Lakeshia Bush; Leslie Cooperman; Agustin Gonzalez-Vicente; Leal Herlitz; Stacey Jolly; Jane Nguyen; John O'toole; Ellen Palmer; Emilio Poggio; John Sedor; Dianna Sendrey; Kassandra Spates-Harden; Jonathan Taliercio

*University of Colorado, Denver, CO:* Petter M. Bjornstad; Laura Pyle; Carissa Vinovskis

*Columbia University, New York, NY:* Paul Appelbaum; Jonathan M. Barasch; Andrew S. Bomback; Pietro A. Canetta; Vivette D. D'Agati; Krzysztof Kiryluk; Satoru Kudose; Karla Mehl; Ning Shang; Olivia Balderes

*Duke University, Durham, NC:* Shweta Bansal

*European Molecular Biology Laboratory, Heidelberg, Germany:* Theodore Alexandrov

*Harvard University, Cambridge, MA:* Helmut Rennke

*Indiana University, Indianapolis, IN:* Tarek M. El-Achkar; Daria Barwinska; Sharon Bledsoe; Katy Borner; Andreas Bueckle; Yinghua Cheng; Pierre C. Dagher; Kenneth W. Dunn; Michael T. Eadon; Michael J. Ferkowicz; Bruce W. Herr; Katherine J. Kelly; Ricardo Melo Ferreira; Ellen M. Quardokus; Elizabeth Record; Marcelino Rivera; Jing Su; Timothy A. Sutton; James C. Williams, Jr.; Seth Winfree

*John Hopkins University, Baltimore, MD:* Steven Menez; Chirag R. Parikh; Avi Rosenberg; Celia P. Corona-Villalobos; Yumeng Wen

*Joslin Diabetes Center, Boston, MA:* Camille Johansen; Sylvia E. Rosas; Neil Roy; Jennifer Sun;

Mark Williams

*Mount Sinai, New York, NY:* Evren U. Azeloglu; Jens Hansen; Cijang He; Ravi Iyengar;  
Yuguang Xiong

*Northshore, Evanston, IL:* Pottumarthi Prasad

*Northwestern University, Evanston, IL:* Anand Srivastava

*Ohio State University, Columbus, OH:* Sethu M. Madhavan; Samir Parikh; Brad Rovin; John P. Shapiro

*Pacific Northwest National Laboratories, Richland, WA:* Christopher R. Anderton; Jessica Lukowski; Ljiljana Pasa-Tolic; Dusan Velickovic

*Parkland Center for Clinical Innovation, Dallas, TX:* George (Holt) Oliver

*Patient Advocates:* Joseph Ardayfio; Jack Bebiak; Keith Brown; Taneisha Campbell; Catherine E. Campbell; Lynda Hayashi; Nichole Jefferson; Glenda V. Roberts; John Saul; Anna Shpigel; Christy Stutzke; Robert Koewler; Roy Pinkeney

*Princeton University, Princeton, NJ:* Rachel Sealfon; Olga Troyanskaya; Aaron Wong

*Providence Medical Research Center, Spokane, WA:* Katherine R. Tuttle

*Seattle Children's Hospital, Seattle, WA:* Ari Pollack

*Stanford University, Stanford, CA:* Yury Goltsev

*State University of New York, Buffalo, NY:* Nicholas Lucarelli; Pinaki Sarder

*University of California San Diego, La Jolla, CA:* Blue B. Lake; Kun Zhang

*University of California San Francisco, San Francisco, CA:* Patrick Boada; Zoltan G. Laszik; Garry Nolan; Kavya Anjani; Minnie Sarwal; Tariq Mukatash; Tara Sigdel

*University of Cincinnati, Cincinnati, OH:* Rita R. Alloway; Ashley R. Burg; Paul J. Lee; Adele Rike; Tiffany Shi; E. Steve Woodle

*University of Michigan, Ann Arbor, MI:* Ulysses GJ. Balis; Victoria M. Blanc; Ninive C. Conser; Sean Eddy; Renee Frey; Yougqun He; Jeffrey B. Hodgins; Matthias Kretzler; Chrysta Lienczewski; Jinghui Luo; Laura H. Mariani; Rajasree Menon; Edgar Otto; Jennifer Schaub; Becky Steck;

*University of Pittsburgh, Pittsburgh, PA:* Michele M. Elder; Matthew Gilliam; Daniel E. Hall; Raghavan Murugan; Paul M. Palevsky; Parmjeet Randhawa; Matthew Rosengart; Mitchell Tublin; Tina Vita; John A. Kellum; James Winters

*University of Washington, Seattle, WA:* Charles E. Alpers; Ashley Berglund; Kristina N. Blank; Jonas Carson; Stephen Daniel; Ian H. De Boer; Ashveena L. Dighe; Frederick Dowd; Stephanie M. Grewenow; Jonathan Himmelfarb; Andrew N. Hoofnagle; Christine Limonte; Robyn L.

McClelland; Sean D. Mooney; Kasra Rezaei; Stuart Shankland; Jamie Snyder; Ruikang Wang; Adam Wilcox; Kayleen Williams; Christopher Park

*UT Health San Antonio, San Antonio, TX:* Shweta Bansal; Richard Montellano; Annapurna Pamreddy; Kumar Sharma; Manjeri Venkatachalam; Hongping Ye; Guanshi Zhang

*UT Southwestern Medical Center, Dallas, TX:* S. Susan Hedayati; Asra Kermani; Simon C. Lee; Christopher Y. Lu; R. Tyler Miller; Orson W. Moe; Jiten Patel; Anil Pillai; Kamalanathan Sambandam; Jose Torrealba; Robert D. Toto; Miguel Vazquez; Nancy Wang; Natasha Wen; Dianbo Zhang; Harold Park

*Vanderbilt University, Nashville, TN:* Richard M. Caprioli; Nathan Patterson; Kavya Sharman; Jeffrey M. Spraggins; Raf Van de Plas

*Washington University in St. Louis, St. Louis, MO:* Jeanine Basta; Sabine M. Diettman; Joseph P. Gaut; Sanjay Jain; Michael I. Rauchman; Anitha Vijayan

*Yale University, New Haven, CT:* Lloyd G. Cantley; Vijaykumar R. Kakade; Dennis Moledina; Melissa M. Shaw; Ugochukwu Ugwuowo; Francis P. Wilson; Tanima Arora

## Supplementary Methods

### *Measurement of ANGPT2 using ELISA*

Plasma samples (1:10) and standards were assayed in duplicate with three control samples, high, medium, and low concentration, in each plate accounting for inter-plate variability. Absorbance at 450 nm was read with the VersaMax Microplate Reader (Molecular Devices) and results calculated with the SoftMax Pro software.

### *SOMAscan measurement*

Briefly, plasma samples were incubated with aptamers, washed and quantified with an Agilent microarray (Agilent Technologies) containing complementary aptamer sequence DNA probes. Hybridized aptamers were detected by their fluorescent tags. The readout in relative fluorescent units were directly proportional to the amount of target protein in the sample. Further hybridization normalization corrected for systematic effects introduced during the hybridization readout on the microarray by first applying a single scale factor to the measured signals within a sample followed by median signal normalization on SOMAmer signals from a given subarray to remove sample or assay biases. Scale factors were in the expected range of 0.4-2.5. Further calibration involved replicate measurements of a common pooled calibrator plasma sample (S1). Samples in this study were analyzed in batches balanced by prospective case status and masked to the laboratory operators and data processing scientists. Twelve replicate samples across the batches allowed for universal calibration based on intercept and beta estimates from the linear regression model drawn from PROC GLM in SAS.

### *Statistical analysis- Lasso Cox*

Lasso introduces a penalty on the regression coefficients, leading to some coefficients shrinking to zero and thereby simultaneously performing variable selection (S2). The penalty factor of the lasso Cox model was learned from a 5 fold 200 repeats cross validation process, based on minimizing the cross validated deviance defined as  $-2 \times \log(\text{partial likelihood})$  of the model. The repeated grid-search k-fold cross-validation procedure was selected due to the variability of lasso cross validation results in different data splits, which is exaggerated in small sample size and large candidate feature scenario. The method incorporated the variability of different data splits, thus improving the reliability and confidence of the selected optimal model (S3).

### *Bulk RNAseq processing method*

Read-level data was evaluated based on adapter content, GC content, and per-base sequence quality with FastQC (<http://www.bioinformatics.babraham.ac.uk/projects/fastqc/>). In addition, randomly sampled reads were examined for disproportional amounts of extraneous reads with FastqScreen (S4). The reads were mapped to the human reference genome GRCh38.86 with STAR 2.5.2b (S5). With picardtools (<https://broadinstitute.github.io/picard/>), the mapping rates to functional regions such as exons, introns, UTR and intergenic regions was inspected. Gene level quantification with HTseq (S6) generated count level expression matrices that were subsequently transformed with voom (S7) for analysis and dataset-level QC. In short, voom generates microarray-like expression levels from count matrices by estimating the mean-variance relationships of the log2 counts. The resulting log2 expression data is used for established analysis methods. Here we use PCA and Hierarchical Clustering to single out outlier samples that can additionally be associated to read-level abnormalities and are highly

likely to be of technical nature. Any detected outliers are removed and the procedure is reiterated until no more outliers are detected (S8).

#### *Single cell data processing from KPMP cohort*

The detailed protocol on the sample collection, processing and normalization was published previously (S9-S11). In brief, we employed the pipeline from Seurat 3.0 R package on the standard CellRanger output. Following the initial quality steps and cleaning, SCTransform , UMAP and other dimensionality reduction methods were employed (S9; S10). Batch information was included as a covariate in the SCTransform method as implemented in the standard Seurat package.

## Supplementary References

- S1. Niewczas MA, Pavkov ME, Skupien J, Smiles A, Dom ZIM, Wilson JM, Park J, Nair V, Schlafly A, Saulnier PJ, Satake E, Simeone CA, Shah H, Qiu CX, Looker HC, Fiorina P, Ware CF, Sun JK, Doria A, Kretzler M, Susztak K, Duffin KL, Nelson RG, Krolewski AS: A signature of circulating inflammatory proteins and development of end-stage renal disease in diabetes. *Nat Med* 2019;25:805-+
- S2. Tibshirani R: The lasso method for variable selection in the cox model. *Stat Med* 1997;16:385-395
- S3. Krstajic D, Buturovic LJ, Leahy DE, Thomas S: Cross-validation pitfalls when selecting and assessing regression and classification models. *J Cheminform* 2014;6
- S4. Wingett SW, Andrews S: FastQ Screen: A tool for multi-genome mapping and quality control. *F1000Research* 2018;7:1338
- S5. Dobin A, Davis CA, Schlesinger F, Drenkow J, Zaleski C, Jha S, Batut P, Chaisson M, Gingeras TR: STAR: ultrafast universal RNA-seq aligner. *Bioinformatics* 2013;29:15-21
- S6. Anders S, Pyl PT, Huber W: HTSeq--a Python framework to work with high-throughput sequencing data. *Bioinformatics* 2015;31:166-169
- S7. Law CW, Chen Y, Shi W, Smyth GK: voom: Precision weights unlock linear model analysis tools for RNA-seq read counts. *Genome Biol* 2014;15:R29
- S8. Robinson MD, McCarthy DJ, Smyth GK: edgeR: a Bioconductor package for differential expression analysis of digital gene expression data. *Bioinformatics* 2010;26:139-140
- S9. Wu H, Malone AF, Donnelly EL, Kirita Y, Uchimura K, Ramakrishnan SM, Gaut JP, Humphreys BD: Single-Cell Transcriptomics of a Human Kidney Allograft Biopsy Specimen Defines a Diverse Inflammatory Response. *J Am Soc Nephrol* 2018;29:2069-2080
- S10. Menon R, Otto EA, Hoover P, Eddy S, Mariani L, Godfrey B, Berthier CC, Eichinger F, Subramanian L, Harder J, Ju W, Nair V, Larkina M, Naik AS, Luo J, Jain S, Sealfon R, Troyanskaya O, Hacohen N, Hodgins JB, Kretzler M, Kpmp K: Single cell transcriptomics identifies focal segmental glomerulosclerosis remission endothelial biomarker. *JCI Insight* 2020;5
- S11. Menon R, Otto EA, Sealfon R, Nair V, Wong AK, Theesfeld CL, Chen X, Wang Y, Boppana AS, Luo J, Yang Y, Kasson PM, Schaub JA, Berthier CC, Eddy S, Lienczewski CC, Godfrey B, Dagenais SL, Sohaney R, Hartman J, Fermin D, Subramanian L, Looker HC, Harder JL, Mariani LH, Hodgins JB, Sexton JZ, Wobus CE, Naik AS, Nelson RG, Troyanskaya OG, Kretzler M: SARS-CoV-2 receptor networks in diabetic and COVID-19-associated kidney disease. *Kidney Int* 2020;98:1502-1518



## Supplementary Tables

| <b>Table S1. Proteins/SOMAmers associated with DKD progression</b> |           |                |                         |                         |
|--------------------------------------------------------------------|-----------|----------------|-------------------------|-------------------------|
| <b>Protein</b>                                                     | <b>HR</b> | <b>P value</b> | <b>HR.confint.lower</b> | <b>HR.confint.upper</b> |
| EGFR.2677.1.1                                                      | 0.166     | 0.000          | 0.063                   | 0.434                   |
| APOA1.2750.3.2                                                     | 0.266     | 0.001          | 0.118                   | 0.598                   |
| CTSV.3364.76.2                                                     | 0.303     | 0.001          | 0.146                   | 0.629                   |
| CLEC4M.3030.3.2                                                    | 0.168     | 0.002          | 0.055                   | 0.510                   |
| TNFRSF1A.2654.19.1                                                 | 3.255     | 0.002          | 1.546                   | 6.852                   |
| CCL20.2468.62.3                                                    | 2.173     | 0.004          | 1.283                   | 3.678                   |
| HAMP.3504.58.2                                                     | 0.635     | 0.004          | 0.467                   | 0.864                   |
| IL22.2778.10.2                                                     | 2.150     | 0.004          | 1.277                   | 3.622                   |
| IL1RL1.4234.8.2                                                    | 2.744     | 0.004          | 1.375                   | 5.476                   |
| SERPINA4.3449.58.2                                                 | 0.189     | 0.004          | 0.060                   | 0.592                   |
| PGLYRP1.3329.14.2                                                  | 1.714     | 0.006          | 1.171                   | 2.509                   |
| CD5L.3293.2.4                                                      | 2.158     | 0.006          | 1.252                   | 3.718                   |
| IL1RL2.2994.71.2                                                   | 0.159     | 0.006          | 0.043                   | 0.585                   |
| ECE1.3611.70.4                                                     | 0.399     | 0.007          | 0.205                   | 0.773                   |
| GSN.4775.34.3                                                      | 0.146     | 0.007          | 0.036                   | 0.586                   |
| NTN4.3327.27.1                                                     | 2.822     | 0.007          | 1.328                   | 5.996                   |
| FTH1.FTL.5934.1.3                                                  | 0.643     | 0.008          | 0.465                   | 0.890                   |
| YWHAQ.7625.27.3                                                    | 2.713     | 0.008          | 1.297                   | 5.674                   |
| DIABLO.3122.6.2                                                    | 3.907     | 0.008          | 1.425                   | 10.715                  |
| GHR.2948.58.2                                                      | 0.339     | 0.008          | 0.152                   | 0.755                   |
| IBSP.3415.61.2                                                     | 1.862     | 0.008          | 1.174                   | 2.951                   |
| TNFRSF9.2598.9.3                                                   | 2.077     | 0.009          | 1.204                   | 3.581                   |
| ANGPT2.2602.2.2                                                    | 2.323     | 0.009          | 1.236                   | 4.365                   |
| TPM1.5033.27.1                                                     | 1.902     | 0.009          | 1.171                   | 3.091                   |
| TNFRSF4.3730.81.2                                                  | 6.035     | 0.009          | 1.553                   | 23.446                  |
| CA6.3352.80.3                                                      | 0.503     | 0.010          | 0.298                   | 0.847                   |
| CSF3R.2719.3.4                                                     | 1.679     | 0.010          | 1.133                   | 2.490                   |
| HTRA2.3317.33.1                                                    | 2.322     | 0.011          | 1.217                   | 4.432                   |
| ANP32B.4194.26.3                                                   | 3.512     | 0.011          | 1.337                   | 9.222                   |
| HSPB1.11103.24.3                                                   | 0.450     | 0.011          | 0.243                   | 0.834                   |
| VTN.13125.45.3                                                     | 0.451     | 0.011          | 0.244                   | 0.836                   |
| CKAP2.5345.51.3                                                    | 0.394     | 0.012          | 0.191                   | 0.811                   |
| DDR1.4122.12.2                                                     | 0.310     | 0.012          | 0.124                   | 0.774                   |
| CSF1.3738.54.1                                                     | 2.516     | 0.013          | 1.217                   | 5.203                   |
| CD40LG.3534.14.2                                                   | 1.521     | 0.018          | 1.074                   | 2.153                   |

|                    |       |       |       |        |
|--------------------|-------|-------|-------|--------|
| PPIB.4718.5.2      | 1.706 | 0.019 | 1.092 | 2.664  |
| NID2.3633.70.5     | 5.790 | 0.019 | 1.330 | 25.208 |
| AMN.4322.28.3      | 3.775 | 0.021 | 1.223 | 11.656 |
| REG1A.13095.51.3   | 2.046 | 0.021 | 1.114 | 3.755  |
| B2M.3485.28.2      | 3.331 | 0.022 | 1.191 | 9.317  |
| NTRK1.3477.63.2    | 1.577 | 0.022 | 1.067 | 2.329  |
| ALB.3707.12.2      | 0.206 | 0.023 | 0.053 | 0.805  |
| THBS2.3339.33.1    | 1.614 | 0.025 | 1.062 | 2.452  |
| PDIA3.4719.58.2    | 0.205 | 0.025 | 0.051 | 0.822  |
| NOTCH1.5107.7.2    | 0.300 | 0.026 | 0.104 | 0.869  |
| TIMP1.2211.9.6     | 1.885 | 0.027 | 1.076 | 3.303  |
| CD27.5412.53.3     | 0.181 | 0.027 | 0.040 | 0.823  |
| ARID3A.3875.62.1   | 1.345 | 0.027 | 1.034 | 1.749  |
| SCARF1.5129.12.3   | 4.621 | 0.030 | 1.158 | 18.438 |
| CCL19.4922.13.1    | 1.726 | 0.031 | 1.052 | 2.832  |
| FGF8.4394.71.2     | 1.494 | 0.033 | 1.034 | 2.158  |
| IL1B.3037.62.1     | 1.607 | 0.033 | 1.039 | 2.486  |
| AIMP1.2714.78.2    | 0.315 | 0.033 | 0.109 | 0.914  |
| SHC1.5272.55.2     | 2.222 | 0.034 | 1.063 | 4.646  |
| HIPK3.3443.61.2    | 0.414 | 0.035 | 0.182 | 0.938  |
| CCL2.2578.67.2     | 1.291 | 0.035 | 1.018 | 1.636  |
| CD300C.5066.134.3  | 2.578 | 0.035 | 1.068 | 6.222  |
| NGF.5801.72.3      | 1.350 | 0.035 | 1.021 | 1.785  |
| IFNL1.4396.54.1    | 1.432 | 0.036 | 1.024 | 2.001  |
| ACP5.3232.28.2     | 0.297 | 0.036 | 0.096 | 0.924  |
| LCMT1.4237.70.3    | 0.139 | 0.036 | 0.022 | 0.882  |
| MAPK12.5005.4.1    | 1.972 | 0.036 | 1.044 | 3.727  |
| KDR.3651.50.5      | 0.247 | 0.038 | 0.066 | 0.926  |
| C7.2888.49.2       | 3.563 | 0.039 | 1.065 | 11.917 |
| FGF2.3025.50.1     | 0.682 | 0.040 | 0.474 | 0.982  |
| TNFRSF1B.3152.57.1 | 2.506 | 0.040 | 1.042 | 6.028  |
| NCAM1.4498.62.2    | 0.326 | 0.041 | 0.112 | 0.953  |
| CTSF.9212.22.3     | 0.326 | 0.041 | 0.112 | 0.954  |
| ESAM.2981.9.3      | 4.009 | 0.041 | 1.056 | 15.225 |
| IFNGR2.9180.6.3    | 2.181 | 0.041 | 1.031 | 4.616  |
| RPS3A.5484.63.3    | 0.436 | 0.042 | 0.196 | 0.970  |
| APCS.2474.54.5     | 0.410 | 0.043 | 0.173 | 0.971  |
| S100A4.14116.129.3 | 0.424 | 0.043 | 0.184 | 0.975  |
| TNFAIP6.5036.50.1  | 3.088 | 0.044 | 1.029 | 9.264  |
| ALCAM.5451.1.3     | 0.381 | 0.046 | 0.147 | 0.985  |
| GFRA3.2505.49.3    | 1.474 | 0.047 | 1.005 | 2.160  |
| FCGR2B.3310.62.1   | 1.651 | 0.048 | 1.005 | 2.710  |
| KLRK1.3056.11.1    | 2.939 | 0.048 | 1.011 | 8.546  |
| PIGR.3216.2.2      | 1.561 | 0.048 | 1.004 | 2.426  |
| CLEC11A.4500.50.2  | 2.554 | 0.048 | 1.008 | 6.474  |

|                 |       |       |       |       |
|-----------------|-------|-------|-------|-------|
| EHMT2.5843.60.3 | 0.391 | 0.049 | 0.154 | 0.995 |
| KLK6.3450.4.2   | 0.404 | 0.049 | 0.164 | 0.996 |
| SNRPF.5494.52.3 | 0.259 | 0.050 | 0.067 | 0.997 |
| PGAM1.3896.5.2  | 1.224 | 0.050 | 1.000 | 1.498 |

| Table. S2 Association of plasma ANGPT2 measured by ELISA with risk of composite outcome |             |                       |         |
|-----------------------------------------------------------------------------------------|-------------|-----------------------|---------|
| ANGPT2(pg/ml)                                                                           | Event (n/N) | Hazard ratio (95% CI) | P-value |
| log2ANGPT2                                                                              | 28/58       | 2.11 (1.30-3.41)      | 0.002   |
| Q1(1005-1767)                                                                           | 3/15        | 1.00 (Ref)            |         |
| Q2(1813-2333)                                                                           | 7/14        | 5.74 (1.38-23.89)     | 0.016   |
| Q3(2345-3393)                                                                           | 7/14        | 4.99 (1.27-19.55)     | 0.021   |
| Q4(3416-8662)                                                                           | 11/15       | 8.04 (2.13-30.38)     | 0.002   |

**Table S3. Association of plasma ANGPT2 with outcome, stratified by diabetes status, in the CHS cohort**

|             | <b>N (%) events</b> | <b>Outcome OR (95% CI)*</b> | <b>p-value</b> |
|-------------|---------------------|-----------------------------|----------------|
| Overall**   | 74 (2.3)            | 1.50 (1.17, 1.92)           | 0.001          |
| Diabetes    | 21 (4.3)            | 2.25 (1.41, 3.58)           | 0.0006         |
| No diabetes | 53 (2.0)            | 1.28 (0.95, 1.74)           | 0.107          |

Plasma ANGPT2 values were log<sub>2</sub> normalized. Logistic regression models were adjusted for age, sex, race (white vs non-white) baseline eGFR (calculated using cystatin C-creatinine CKD-EPI 2021 equation).

Missing event data, N(%) [inability to calculate eGFR decline due to missing year 4 creatinine] were overall: 815 (26); diabetes stratum: 161 (33); no diabetes stratum: 650 (24).

\*Outcome defined as Incident eGFR decline  $\geq$  30% or ESKD over 4 years, was treated as a binary variable, modeled using logistic regression.

\*\*Analysis in overall cohort additionally adjusted for diabetes history.

**Table S4. Association of plasma ANGPT2 with incident ESKD in CHS cohort, using time-to-event analysis**

|            | <b>N (%) events</b> | <b>Incident ESKD HR (95% CI)*</b> | <b>p-value</b> |
|------------|---------------------|-----------------------------------|----------------|
| CHS cohort | 51 (1.6)            | 1.53 (1.11, 2.10)                 | 0.009          |

The Cox proportional hazard model was adjusted for age, gender, race (white vs non-white), baseline eGFR (calculated using cystatin C-creatinine CKD-EPI 2021 equation) and diabetes history.

\*All events occurring over the duration of the CHS follow-up period were included in the analysis

| Table. S5 ANG-TIE signaling pathway related genes from three databases |                         |                       |
|------------------------------------------------------------------------|-------------------------|-----------------------|
| PID_ANGIOPOIETIN_RECEPTOR_PATHWAY                                      | REACTOME_TIE2_SIGNALING | NETPATH_TEK_SIGNALING |
| AGTR1                                                                  | ANGPT1                  | ACTB                  |
| AKT1                                                                   | ANGPT2                  | BIRC5                 |
| ANGPT1                                                                 | ANGPT4                  | EEFSEC                |
| ANGPT2                                                                 | DOK2                    | GRB7                  |
| ANGPT4                                                                 | GRB14                   | ITGB1                 |
| BMX                                                                    | GRB2                    | MASP2                 |
| CDKN1A                                                                 | GRB7                    | PIK3R2                |
| CRK                                                                    | HRAS                    | PXN                   |
| DOK2                                                                   | KRAS                    | SPHK1                 |
| ELF1                                                                   | NRAS                    | WAS                   |
| ELF2                                                                   | PIK3CA                  | ADAM30                |
| ELK1                                                                   | PIK3CB                  | BMX                   |
| ETS1                                                                   | PIK3R1                  | EGFR                  |
| F2                                                                     | PIK3R2                  | GSK3B                 |
| FES                                                                    | PTPN11                  | ITGB2                 |
| FGF2                                                                   | SHC1                    | MMP2                  |
| FN1                                                                    | SOS1                    | PITPNM3               |
| FOXO1                                                                  | TEK                     | RAC1                  |
| FYN                                                                    |                         | SRC                   |
| GRB14                                                                  |                         | WASF1                 |
| GRB2                                                                   |                         | ADSS                  |
| GRB7                                                                   |                         | CAPZB                 |
| ITGA5                                                                  |                         | EIF3F                 |
| ITGB1                                                                  |                         | GTPBP3                |
| MAPK1                                                                  |                         | ITGB3                 |
| MAPK14                                                                 |                         | MTOR                  |
| MAPK3                                                                  |                         | PKD1                  |
| MAPK8                                                                  |                         | RAF1                  |
| MMP2                                                                   |                         | STAT1                 |
| NCK1                                                                   |                         | ZAP70                 |
| NFKB1                                                                  |                         | AKT1                  |
| NOS3                                                                   |                         | CBL                   |
| PAK1                                                                   |                         | EIF3I                 |
| PIK3CA                                                                 |                         | GYS1                  |
| PIK3R1                                                                 |                         | ITGB5                 |
| PLD2                                                                   |                         | NCK1                  |
| PLG                                                                    |                         | PKD2                  |
| PTK2                                                                   |                         | RASA1                 |

|         |  |         |
|---------|--|---------|
| PTPN11  |  | STAT3   |
| PXN     |  | ZNF397  |
| RAC1    |  | AKT2    |
| RASA1   |  | CCT5    |
| RELA    |  | ELK1    |
| RPS6KB1 |  | HAGH    |
| SHC1    |  | LIMCH1  |
| STAT5A  |  | NF1     |
| STAT5B  |  | PLA2G5  |
| TEK     |  | RELA    |
| TNF     |  | STAT5A  |
|         |  | ALB     |
|         |  | CDC42   |
|         |  | F13A1   |
|         |  | HDAC7   |
|         |  | LONP1   |
|         |  | NFKBIA  |
|         |  | PLCG1   |
|         |  | RHOA    |
|         |  | STAT5B  |
|         |  | ALDOA   |
|         |  | CDH5    |
|         |  | FES     |
|         |  | HIF1A   |
|         |  | MAP2K1  |
|         |  | NONO    |
|         |  | PLD1    |
|         |  | ROCK1   |
|         |  | STAT6   |
|         |  | ANGPT1  |
|         |  | CREB1   |
|         |  | FOXO1   |
|         |  | HNRNPF  |
|         |  | MAP2K2  |
|         |  | NOS3    |
|         |  | PLD2    |
|         |  | RPS6KA1 |
|         |  | TEK     |
|         |  | ANGPT2  |
|         |  | CRK     |
|         |  | FOXO3   |
|         |  | HNRNPH1 |
|         |  | MAP2K4  |
|         |  | PAK1    |
|         |  | PLG     |

|  |  |          |
|--|--|----------|
|  |  | RPS6KA5  |
|  |  | TIE1     |
|  |  | ANGPT4   |
|  |  | CTNNB1   |
|  |  | FYN      |
|  |  | HNRNPM   |
|  |  | MAP3K3   |
|  |  | PDCD6IP  |
|  |  | PPP2CA   |
|  |  | RPS6KB1  |
|  |  | TLN1     |
|  |  | ANGPTL1  |
|  |  | CTPS1    |
|  |  | GAPDH    |
|  |  | HSP90AA1 |
|  |  | MAPK1    |
|  |  | PDIA3    |
|  |  | PRDX4    |
|  |  | RUVBL2   |
|  |  | TNIP2    |
|  |  | ANKRD28  |
|  |  | DIAPH1   |
|  |  | GCDH     |
|  |  | HSPD1    |
|  |  | MAPK14   |
|  |  | PDPK1    |
|  |  | PRKCZ    |
|  |  | SELP     |
|  |  | TXNRD1   |
|  |  | ARHGAP5  |
|  |  | DOK2     |
|  |  | GNA11    |
|  |  | ILK      |
|  |  | MAPK3    |
|  |  | PECAM1   |
|  |  | PTK2     |
|  |  | SERPINH1 |
|  |  | TXNRD3   |
|  |  | BCAR1    |
|  |  | DOK4     |
|  |  | GRB14    |
|  |  | ITGA5    |
|  |  | MAPK8    |
|  |  | PGK1     |
|  |  | PTPN11   |



|  |  |         |
|--|--|---------|
|  |  | SHC1    |
|  |  | VEGFA   |
|  |  | BCL2    |
|  |  | DYNC1H1 |
|  |  | GRB2    |
|  |  | ITGAV   |
|  |  | MAPK9   |
|  |  | PIK3R1  |
|  |  | PTPRB   |
|  |  | SOS1    |
|  |  | VIM     |

**Table. S6 Basic clinical data of DKD patients included in the ScRNAseq analysis**

| <b>Tissue Type</b> | <b>Sex</b> | <b>Age (Years)</b> | <b>Race</b>                | <b>Baseline eGFR (ml/min/1.73m2)</b> | <b>Diabetes</b> | <b>Diabetes Duration (Years)</b> | <b>Hypertension History</b> |
|--------------------|------------|--------------------|----------------------------|--------------------------------------|-----------------|----------------------------------|-----------------------------|
| CKD                | Female     | 60-69              | White,Other                | 20-29                                | Yes             | 20-24                            | Yes                         |
| CKD                | Female     | 60-69              | Black or African- American | 80-89                                | Yes             | 5-9                              | Yes                         |
| CKD                | Female     | 30-39              | White                      | 100-109                              | Yes             | 20-24                            | Yes                         |
| CKD                | Female     | 60-69              | Black or African- American | 110-119                              | Yes             | 5-9                              | Yes                         |
| CKD                | Male       | 70-79              |                            | 40-49                                | Yes             | 10-14                            | Yes                         |
| CKD                | Female     | 30-39              | White                      | 30-39                                | Yes             | 20-24                            | Yes                         |
| CKD                | Male       | 60-69              | White                      | 30-39                                | Yes             | 0-4                              | No                          |
| CKD                | Female     | 70-79              | White                      | 60-69                                | Yes             | 10-14                            | Yes                         |
| CKD                | Male       | 70-79              | White                      | 40-49                                | Yes             | 25-29                            | Yes                         |
| CKD                | Female     | 60-69              | White                      | 40-49                                | Yes             | 30-34                            | Yes                         |

Fig. S1. Curation of an unbiased ANG-TIE signaling gene set.

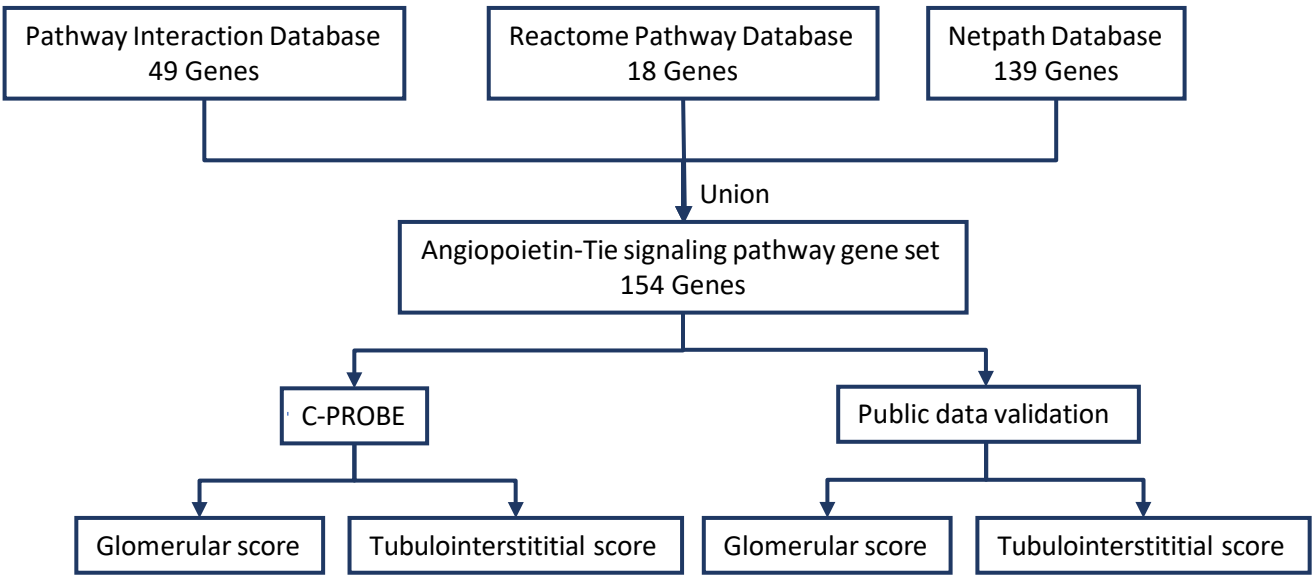

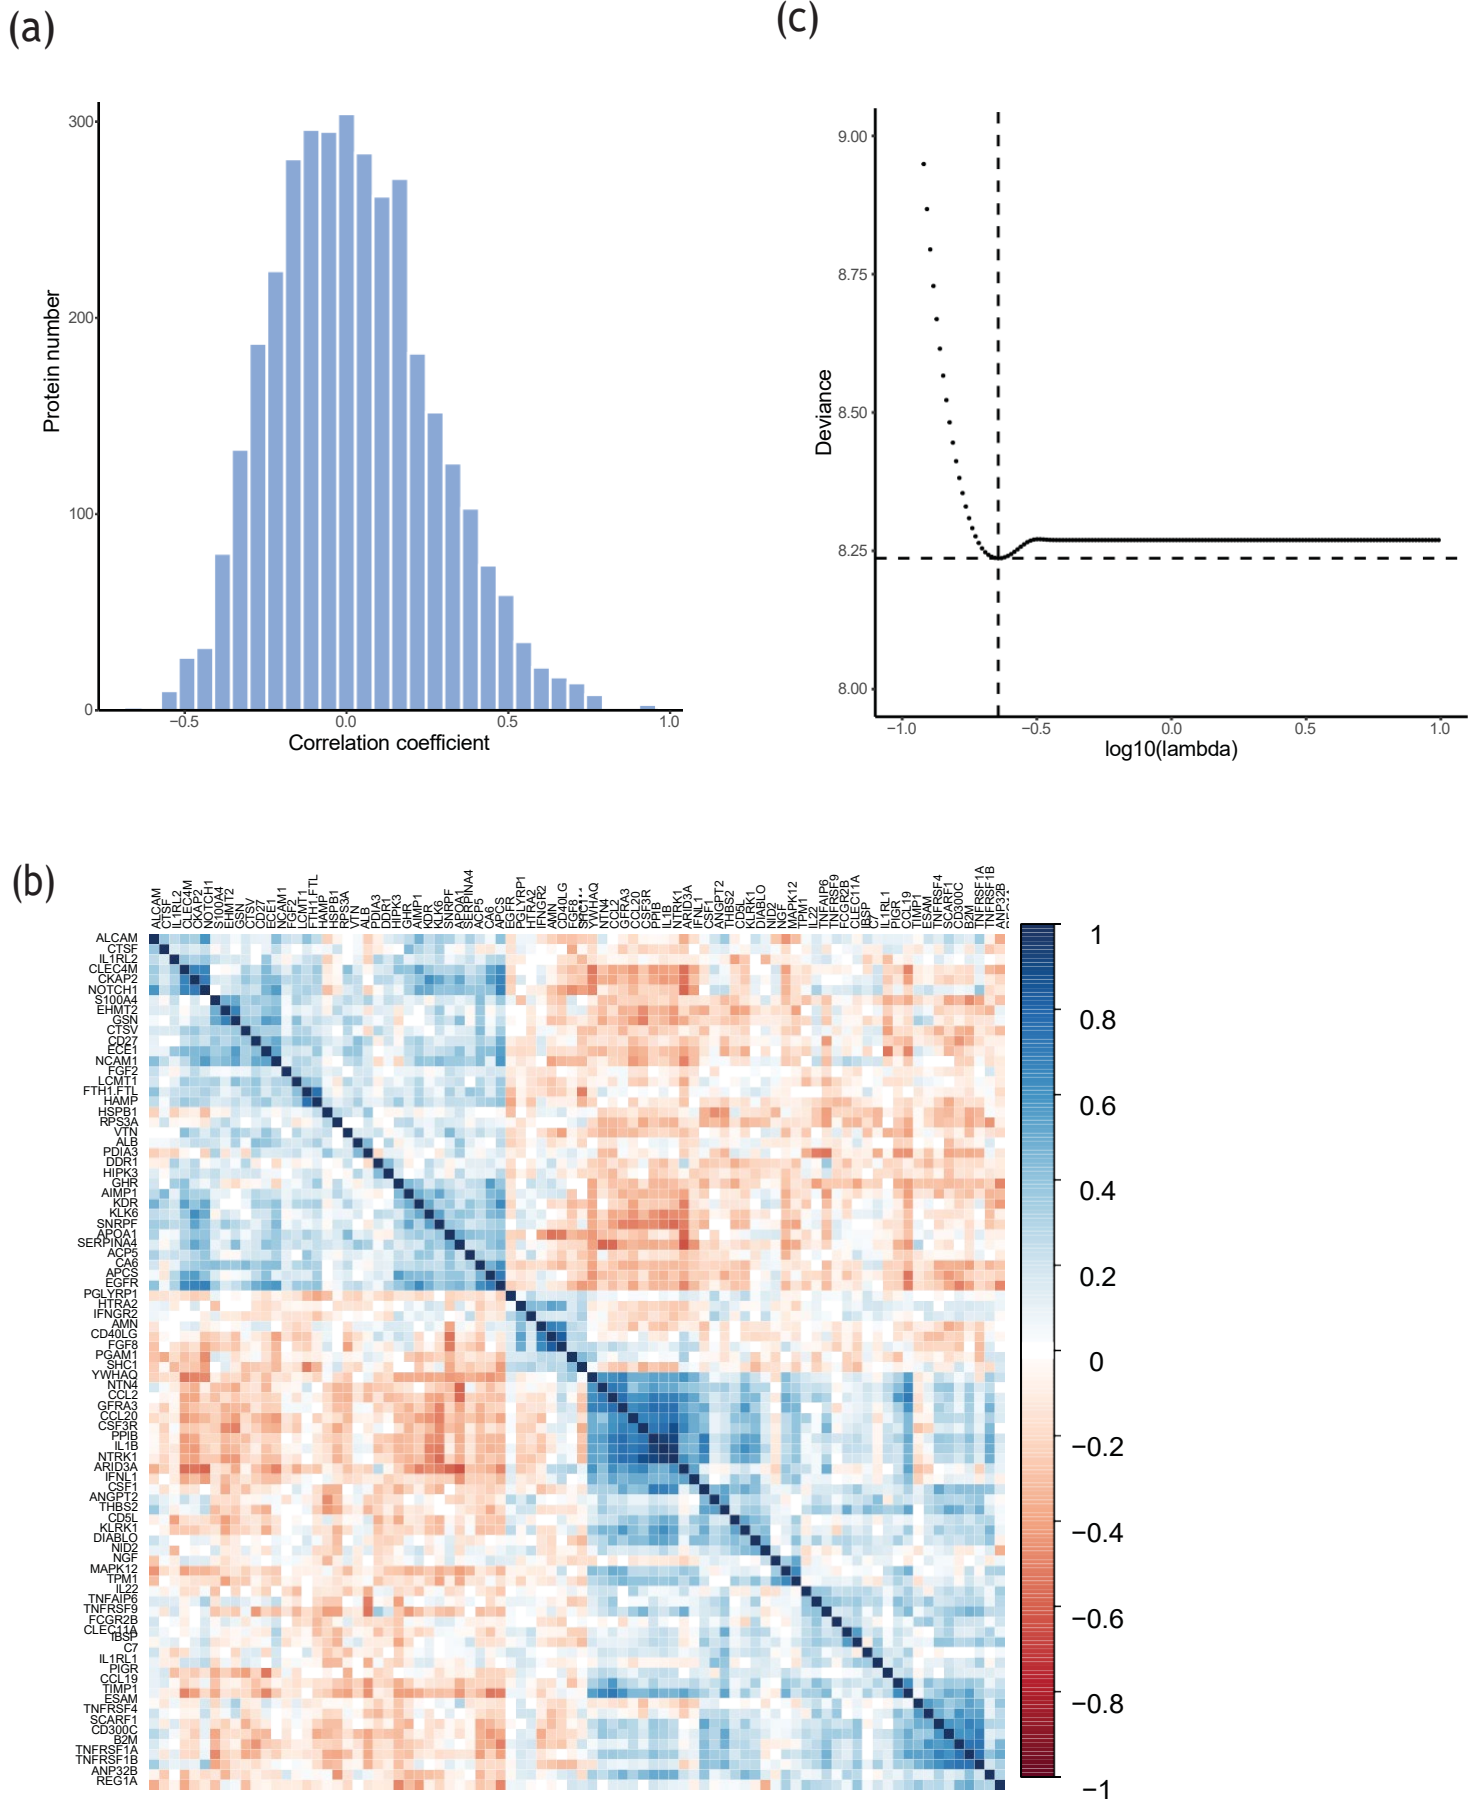

**Fig. S2. Correlation matrix between the univariate significant plasma proteins and the lasso cross validation curve.** (a) Correlation distribution of the univariate significant plasma proteins. (b) Correlation structure of univariate significant proteins. Proteins were ordered by hierarchical clustering. Distinct correlation patterns were observed for plasma proteins in different clusters. (c) Cross validation curve of the lasso Cox model. The cross validation curve was the average of 200 repeats. A set of 3 biomarkers were selected based on the tuning parameter  $\log(\lambda) = -0.64$  that gave the lowest deviance.

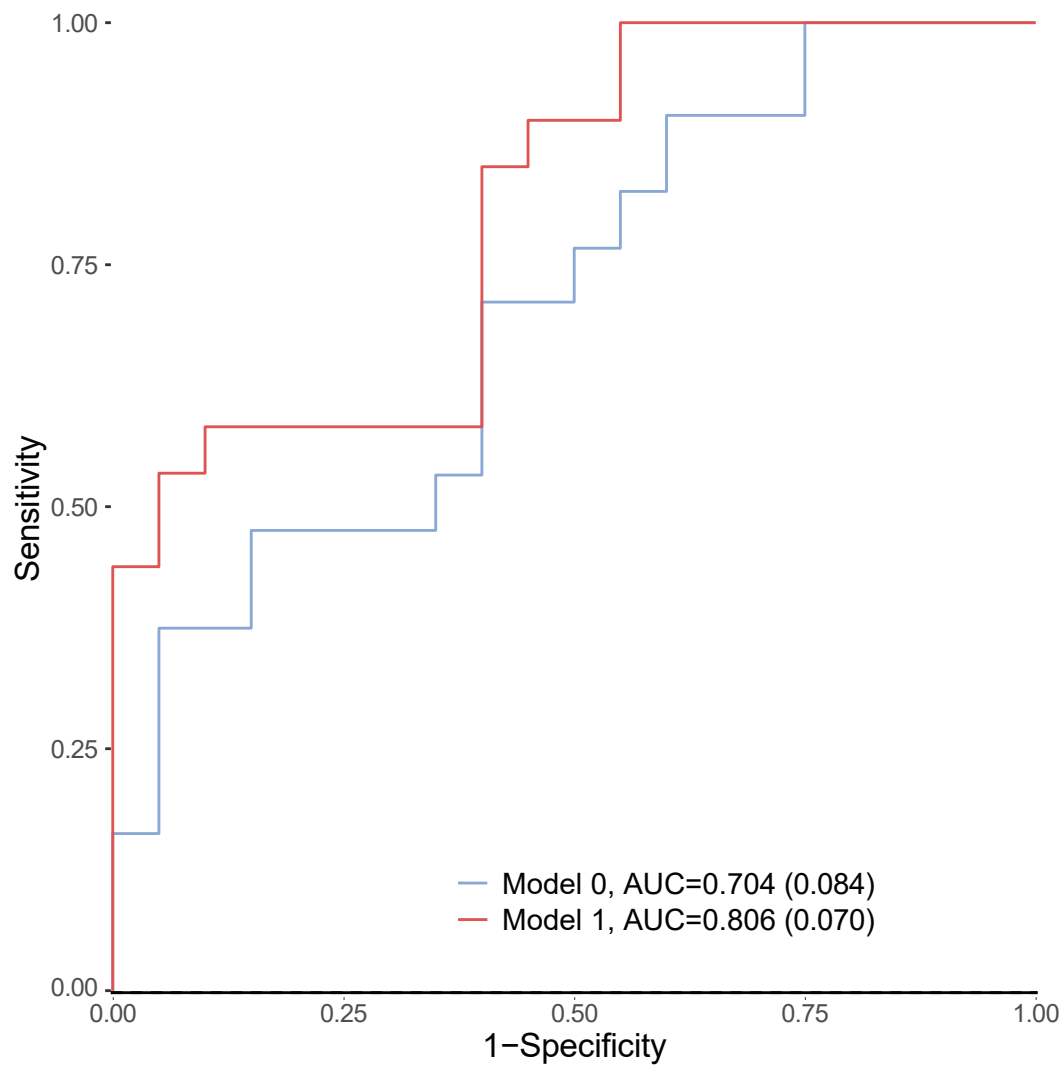

**Fig. S3. Time-dependent ROC curve truncated at 5 years for clinical model and the joint clinical and biomarker model.**

Model 0 covariates: age, gender, race, eGFR and uACR.

Model 1 covariates: age, gender, race, eGFR uACR, ANGPT2, CLEC4M and EGFR.

ribonucleoside triphosphate biosynthetic process  
cell-matrix adhesion  
cellular response to oxidative stress  
positive regulation of apoptotic process

superoxide metabolic process  
transmembrane receptor protein  
tyrosine kinase signaling pathway  
immune effector process  
positive regulation of cell motility

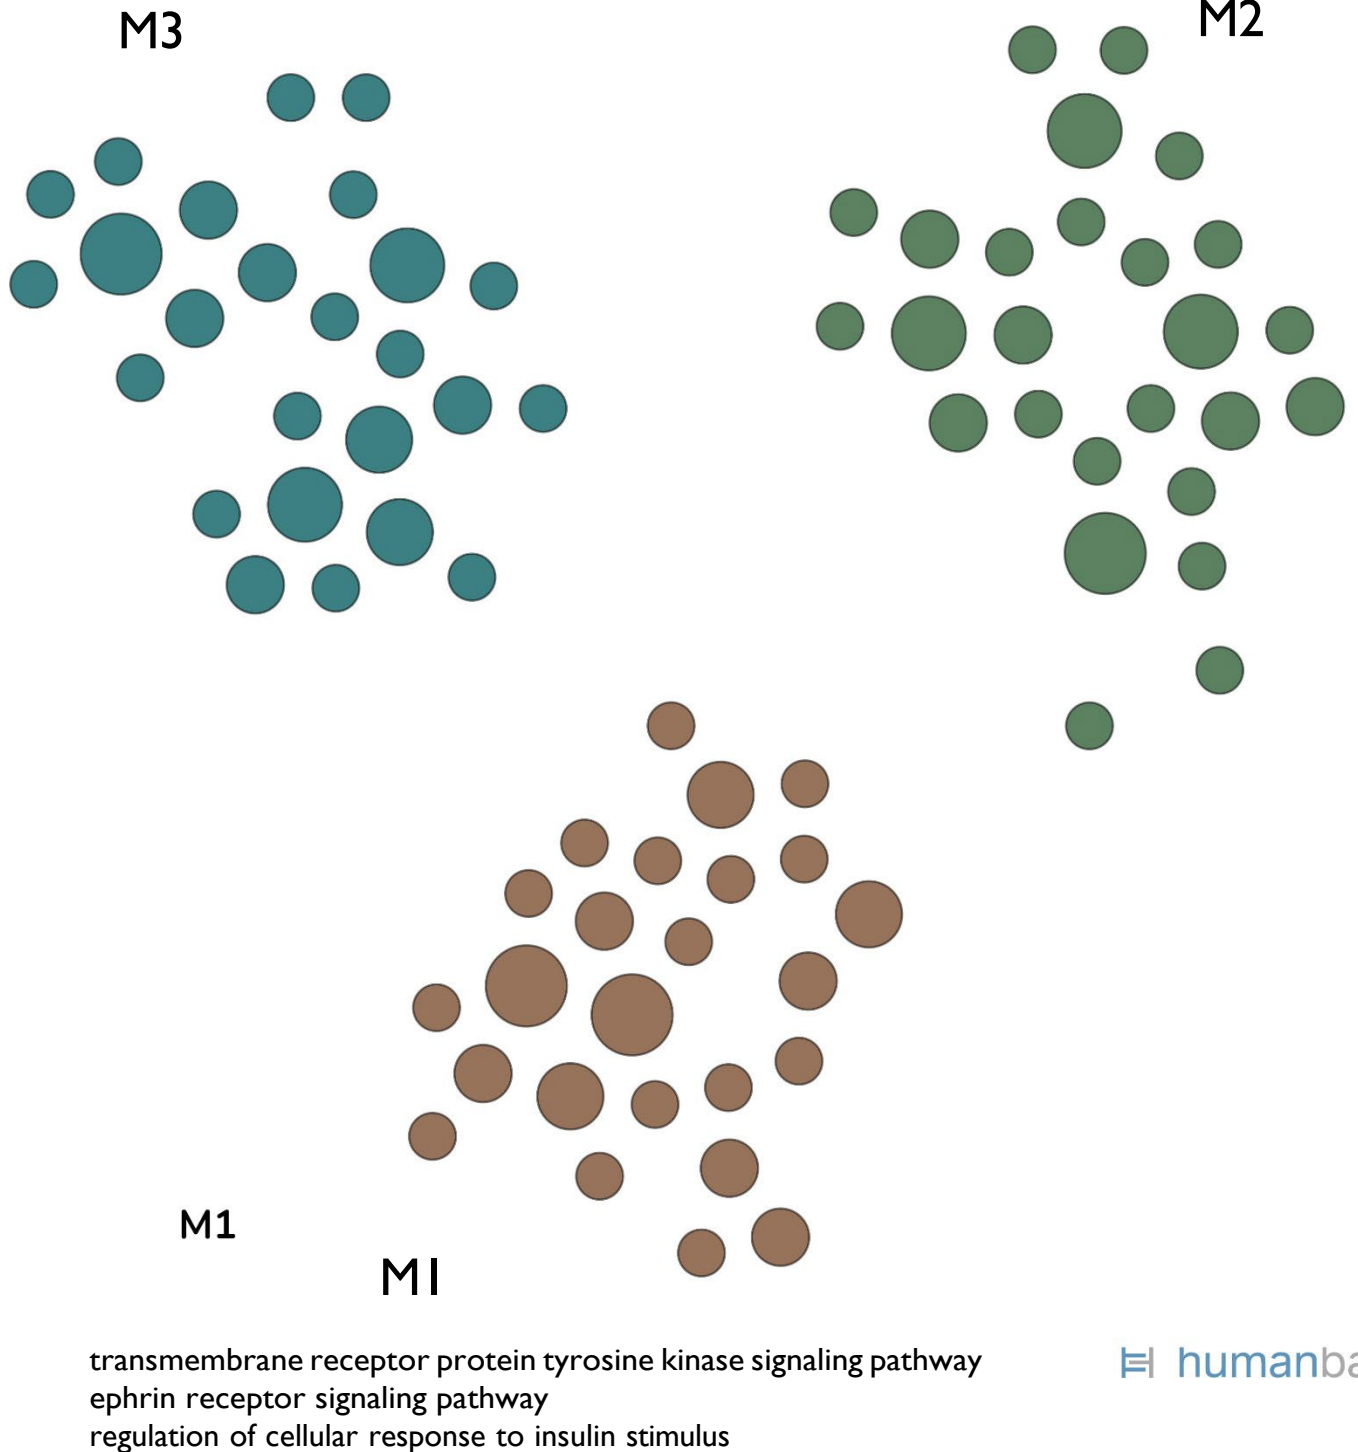

**Fig. S4. Functional characterization of the curated ANG-TIE signaling network genes in the kidney.** Kidney functional modules were generated using HumanBase (<https://hb.flatironinstitute.org/>), by projecting the ANG-TIE signature onto the kidney active functional network followed by community clustering to identify cohesive functional modules. Enriched biological processes are shown for each module. Each dot represents input gene, and the size of the dot indicates relative connectivity.

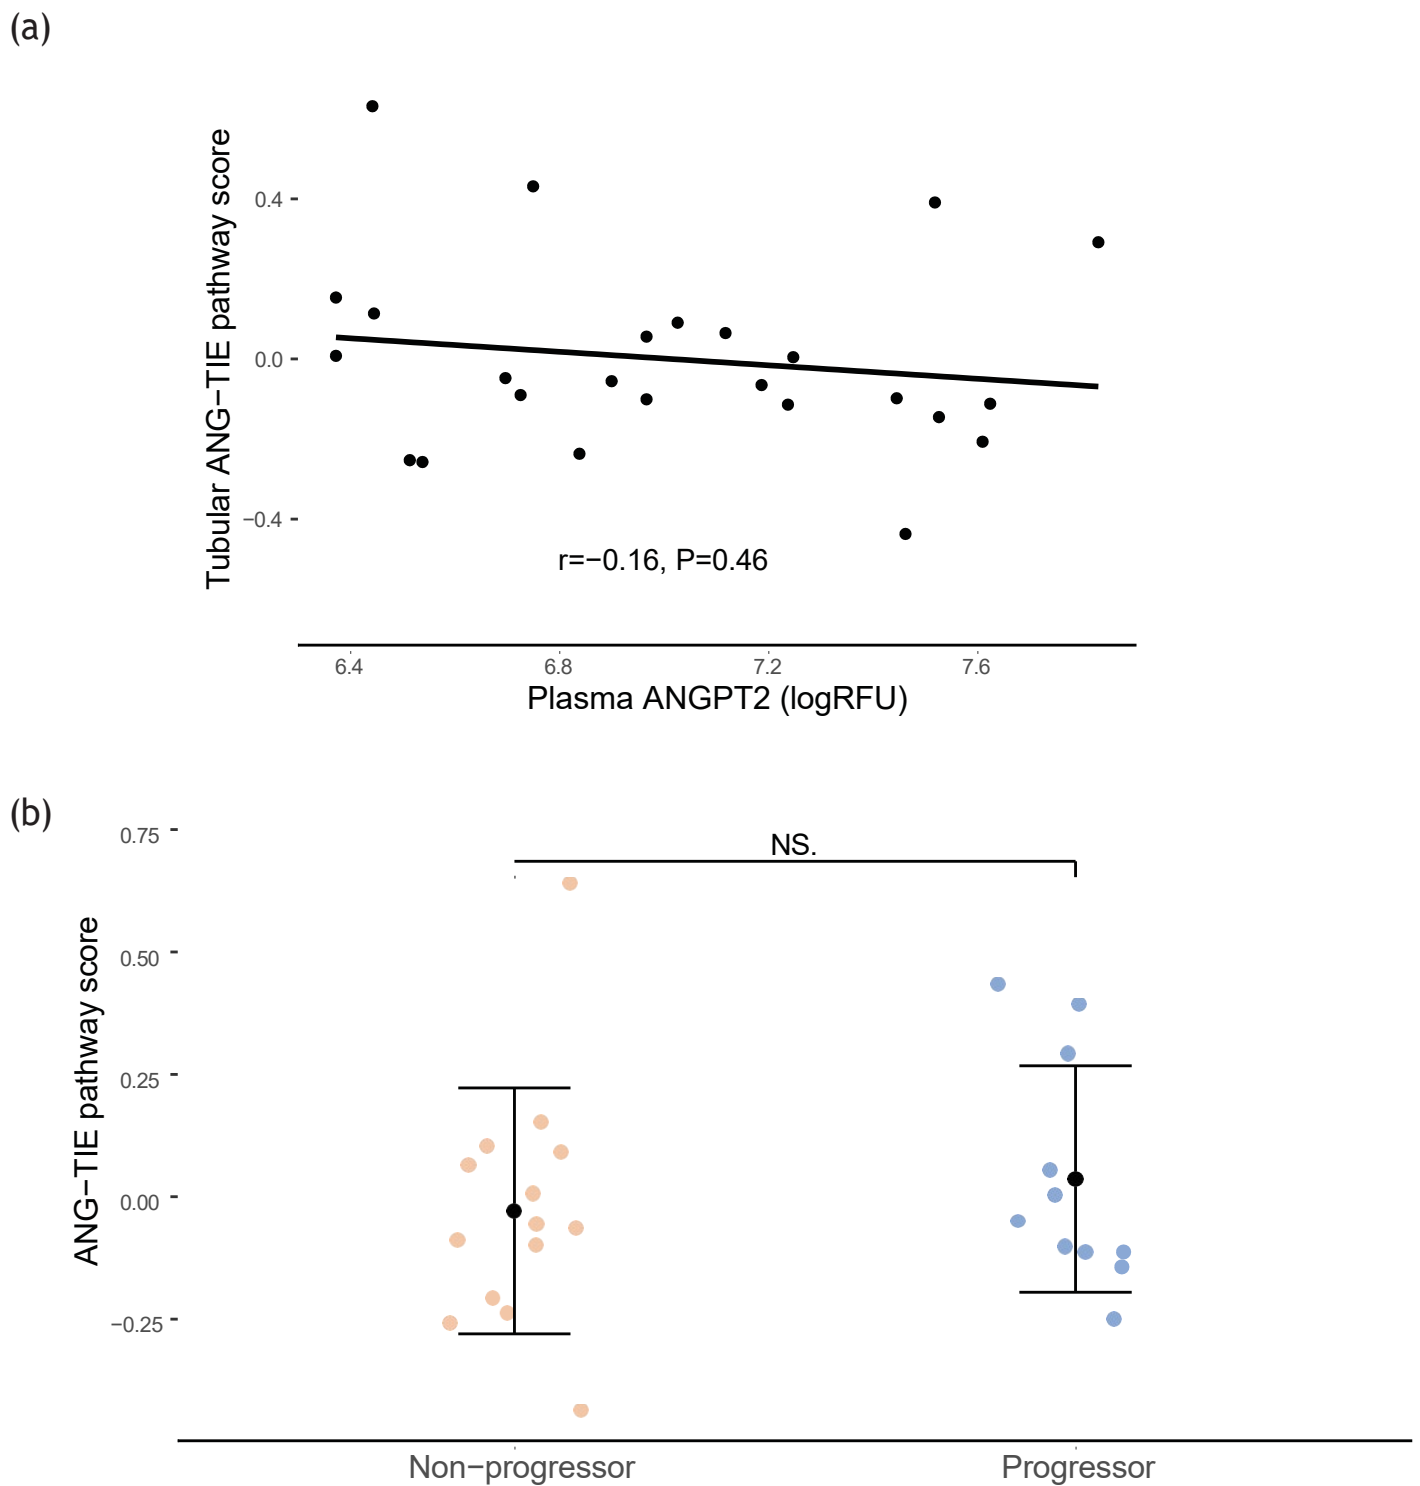

**Fig. S5. Association of tubular ANG-TIE pathway activation score with plasma ANGPT2 level and kidney outcome (n=25).** (a) The association of plasma ANGPT2 level with tubular ANG-TIE pathway activation score (n=25). (b) Tubular ANG-TIE pathway activation score association with outcome in patients from C-PROBE Group B. (NS indicates p value > 0.05).

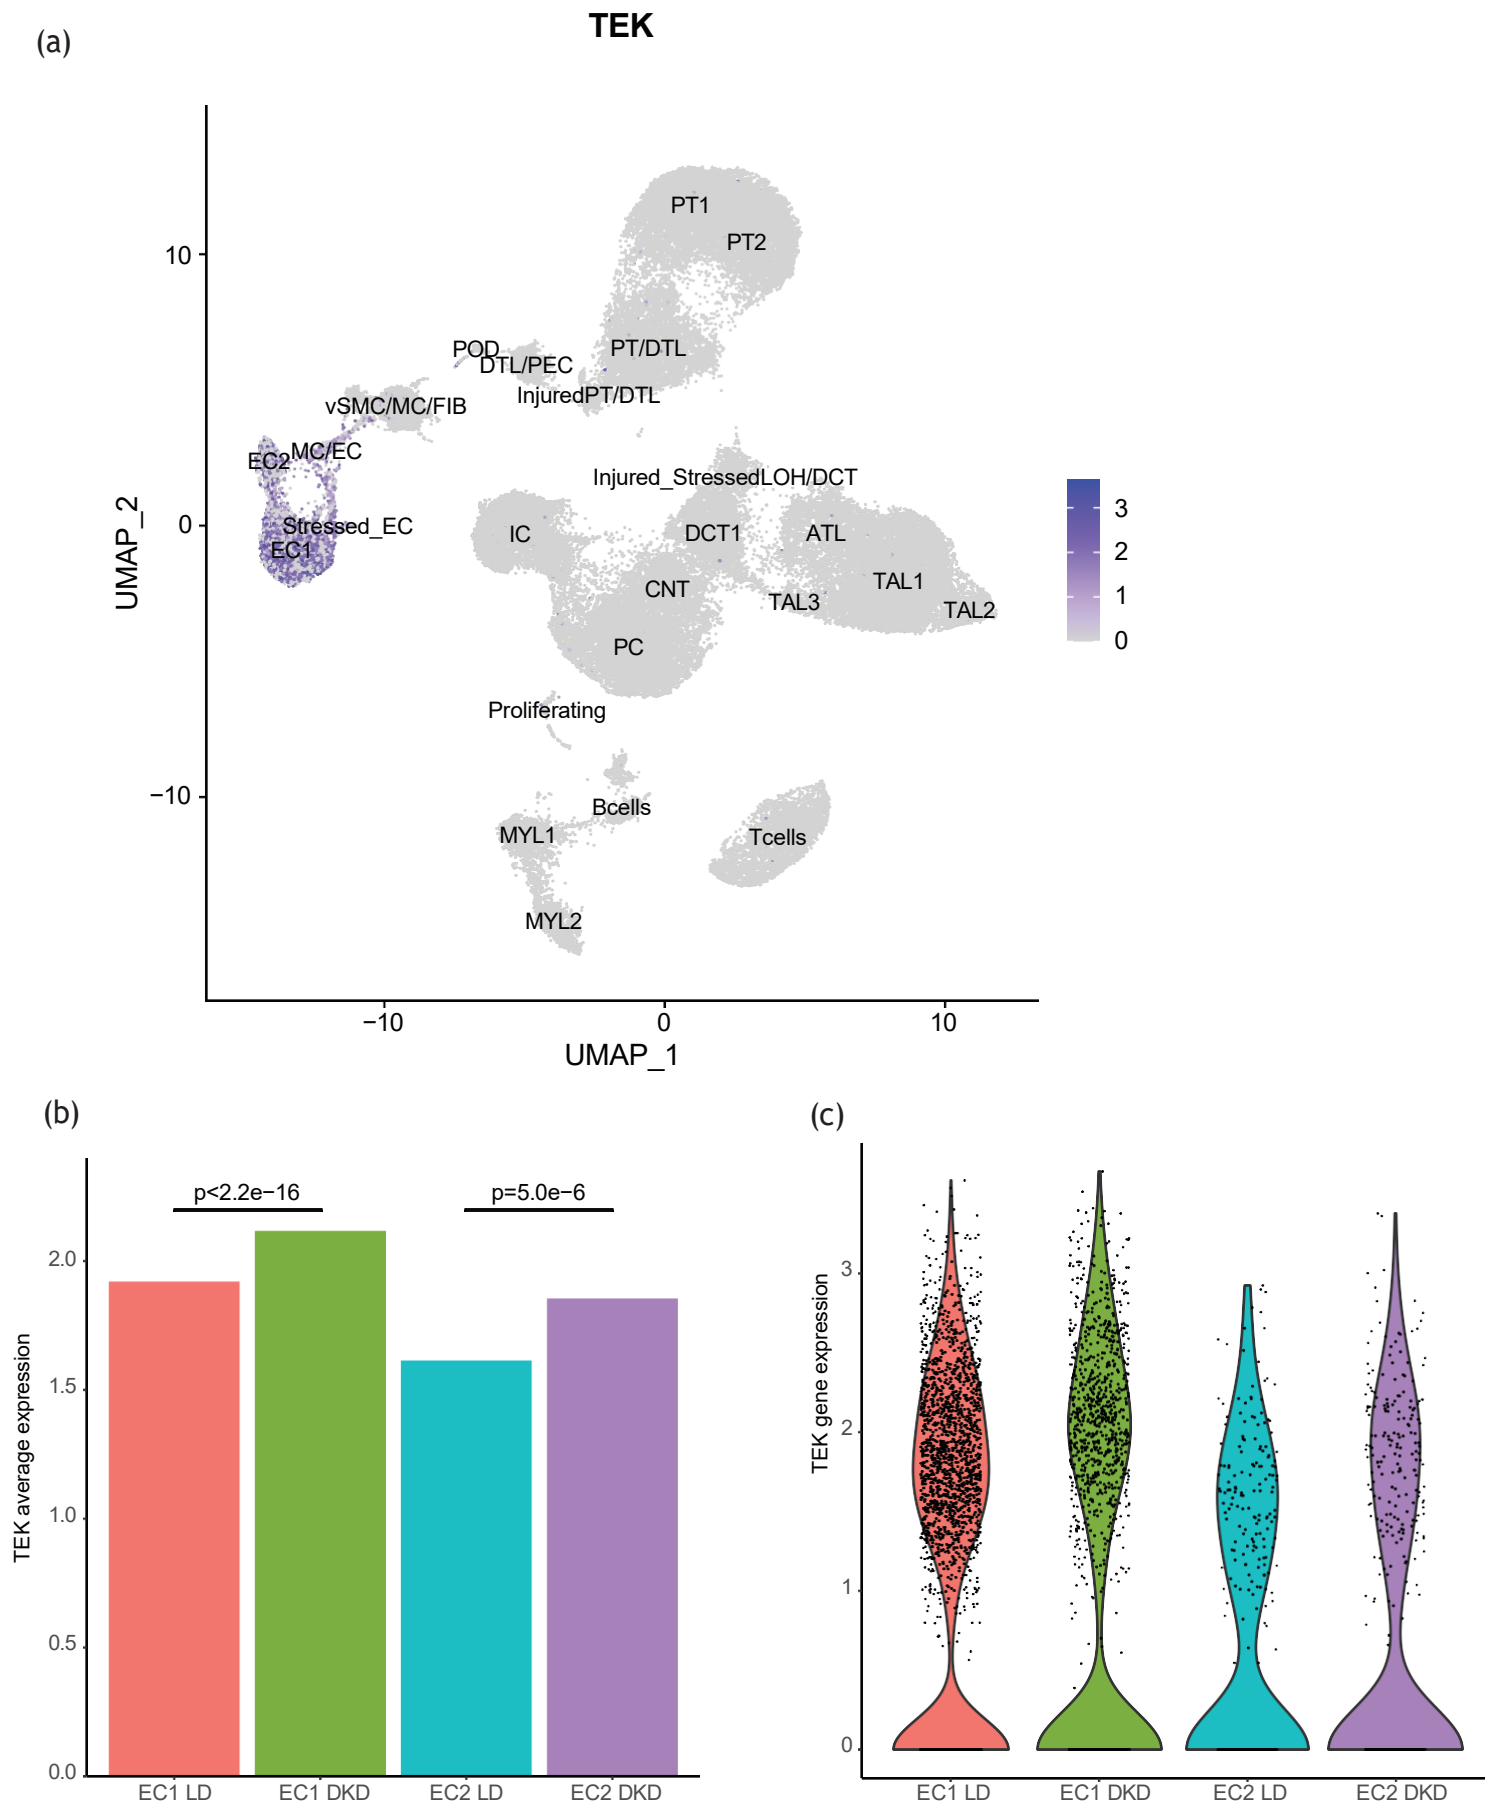

**Fig. S6. *TEK* gene expression in KPMP single cell data from patients with DKD and living kidney donors (LD).** (a) UMAP of *TEK* gene expression in KPMP data. Cells clusters labeled by cell identity. (b) Average value of *TEK* gene in endothelial cells whose *TEK* expression is more than 0. Mann-Whitney U test was used to test the difference between groups. (c) Violin plot of *TEK* gene in endothelial cells
