# Supplementary material
Source: publisher figshare collection journal article supplement (https://diabetesjournals.figshare.com/articles/dataset/_/20736553)
Supplement: Supplementary file 1 [file 1]

**For the Kidney Precision Medicine Project**

*American Association of Kidney Patients, Tampa, FL*: Richard Knight

*Beth Israel Deaconess, Boston, MA*: Stewart H. Lecker; Isaac Stillman

*Boston Cell Standards, Boston, MA*: Steve Bogen

*Boston University and Boston Medical Center, Boston, MA*: Afolarin A. Amodu; Titlayo Ilori; Shana Maikhor; Insa Schmidt, Laurence H. Beck; Joel M. Henderson; Ingrid Onul; Ashish Verma, Sushrut Waikar

*Brigham & Women's Hospital, Boston, MA*: Gearoid M. McMahon; M. Todd Valerius; Sushrut Waikar; Astrid Weins; Mia R. Colona

*Broad Institute, Cambridge, MA*: Anna Greka; Nir Hacohen; Paul J. Hoover; Jamie L. Marshall

*Case Western Reserve, Cleveland, OH*: Mark Aulisio; Yijiang M. Chen; Andrew Janowczyk; Catherine Jayapandian; Vidya S. Viswanathan; William S. Bush; Dana C. Crawford; Anant Madabhushi

*Cleveland Clinic, Cleveland, OH*: Lakeshia Bush; Leslie Cooperman; Agustin Gonzalez-Vicente; Leal Herlitz; Stacey Jolly; Jane Nguyen; John O'toole; Ellen Palmer; Emilio Poggio; John Sedor; Dianna Sendrey; Kassandra Spates-Harden; Jonathan Taliercio

*University of Colorado*, *Denver, CO*: Petter M. Bjornstad; Laura Pyle; Carissa Vinovskis

*Columbia University, New York, NY*: Paul Appelbaum; Jonathan M. Barasch; Andrew S. Bomback; Pietro A. Canetta; Vivette D. D'Agati; Krzysztof Kiryluk; Satoru Kudose; Karla Mehl; Ning Shang; Olivia Balderes

*Duke University, Durham, NC*: Shweta Bansal

*European Molecular Biology Laboratory, Heidelberg, Germany*: Theodore Alexandrov

*Harvard University, Cambridge, MA*: Helmut Rennke

*Indiana University, Indianapolis, IN*: Tarek M. El-Achkar; Daria Barwinska; Sharon Bledsoe; Katy Borner; Andreas Bueckle; Yinghua Cheng; Pierre C. Dagher; Kenneth W. Dunn; Michael T. Eadon; Michael J. Ferkowicz; Bruce W. Herr; Katherine J. Kelly; Ricardo Melo Ferreira; Ellen M. Quardokus; Elizabeth Record; Marcelino Rivera; Jing Su; Timothy A. Sutton; James C. Williams, Jr.; Seth Winfree

*John Hopkins University, Baltimore, MD*: Steven Menez; Chirag R. Parikh; Avi Rosenberg; Celia P. Corona-Villalobos; Yumeng Wen

*Joslin Diabetes Center, Boston, MA*: Camille Johansen; Sylvia E. Rosas; Neil Roy; Jennifer Sun; Mark Williams

*Mount Sinai, New York, NY*: Evren U. Azeloglu; Jens Hansen; Cijang He; Ravi Iyengar; Yuguang Xiong

*Northshore, Evanston, IL*: Pottumarthi Prasad

*Northwestern University, Evanston, IL*: Anand Srivastava

*Ohio State University, Columbus, OH*: Sethu M. Madhavan; Samir Parikh; Brad Rovin; John P. Shapiro

*Pacific Northwest National Laboratories, Richland, WA*: Christopher R. Anderton; Jessica Lukowski; Ljiljana Pasa-Tolic; Dusan Velickovic

*Parkland Center for Clinical Innovation, Dallas, TX*: George (Holt) Oliver

*Patient Advocates*: Joseph Ardayfio; Jack Bebiak; Keith Brown; Taneisha Campbell; Catherine E. Campbell; Lynda Hayashi; Nichole Jefferson; Glenda V. Roberts; John Saul; Anna Shpigel; Christy Stutzke; Robert Koewler; Roy Pinkeney

*Princeton University, Princeton, NJ*: Rachel Sealfon; Olga Troyanskaya; Aaron Wong

*Providence Medical Research Center, Spokane, WA*: Katherine R. Tuttle

*Seattle Children's Hospital, Seattle, WA*: Ari Pollack

*Stanford University, Stanford, CA*: Yury Goltsev

*State University of New York, Buffalo, NY*: Nicholas Lucarelli; Pinaki Sarder

*University of California San Diego, La Jolla, CA*: Blue B. Lake; Kun Zhang

*University of California San Francisco, San Francisco, CA*: Patrick Boada; Zoltan G. Laszik; Garry Nolan; Kavya Anjani; Minnie Sarwal; Tariq Mukatash; Tara Sigdel

*University of Cincinnati, Cincinnati, OH*: Rita R. Alloway; Ashley R. Burg; Paul J. Lee; Adele Rike; Tiffany Shi; E. Steve Woodle

*University of Michigan, Ann Arbor, MI*; Ulysses GJ. Balis; Victoria M. Blanc; Ninive C. Conser; Sean Eddy; Renee Frey; Yougqun He; Jeffrey B. Hodgin; Matthias Kretzler; Chrysta Lienczewski; Jinghui Luo; Laura H. Mariani; Rajasree Menon; Edgar Otto; Jennifer Schaub; Becky Steck;

*University of Pittsburgh, Pittsburgh, PA*: Michele M. Elder; Matthew Gilliam; Daniel E. Hall; Raghavan Murugan; Paul M. Palevsky; Parmjeet Randhawa; Matthew Rosengart; Mitchell Tublin; Tina Vita; John A. Kellum; James Winters

*University of Washington, Seattle, WA*: Charles E. Alpers; Ashley Berglund; Kristina N. Blank; Jonas Carson; Stephen Daniel; Ian H. De Boer; Ashveena L. Dighe; Frederick Dowd; Stephanie M. Grewenow; Jonathan Himmelfarb; Andrew N. Hoofnagle; Christine Limonte; Robyn L. McClelland; Sean D. Mooney; Kasra Rezaei; Stuart Shankland; Jamie Snyder; Ruikang Wang; Adam Wilcox; Kayleen Williams; Christopher Park

*UT Health San Antonio, San Antonio, TX*: Shweta Bansal; Richard Montellano; Annapurna Pamreddy; Kumar Sharma; Manjeri Venkatachalam; Hongping Ye; Guanshi Zhang

*UT Southwestern Medical Center, Dallas, TX*: S. Susan Hedayati; Asra Kermani; Simon C. Lee; Christopher Y. Lu; R. Tyler Miller; Orson W. Moe; Jiten Patel; Anil Pillai; Kamalanathan Sambandam; Jose Torrealba; Robert D. Toto; Miguel Vazquez; Nancy Wang; Natasha Wen; Dianbo Zhang; Harold Park

*Vanderbilt University, Nashville, TN*: Richard M. Caprioli; Nathan Patterson; Kavya Sharman; Jeffrey M. Spraggins; Raf Van de Plas

*Washington University in St. Louis, St. Louis, MO*: Jeanine Basta; Sabine M. Diettman; Joseph P. Gaut; Sanjay Jain; Michael I. Rauchman; Anitha Vijayan

*Yale University, New Haven, CT*: Lloyd G. Cantley; Vijaykumar R. Kakade; Dennis Moledina; Melissa M. Shaw; Ugochukwu Ugwuowo; Francis P. Wilson; Tanima Arora

**For the Michigan Kidney Translational Core C-PROBE Investigator Group**

*University of Michigan, Ann Arbor, MI:* Markus Bitzer*;* Frank C. Brosius III*;* Crystal Gadegbeku

Debbie Gipson (Pediatric Nephrology); Jennifer Hawkins; Matthias Kretzler; Chrysta Lienczewski; Subramaniam Pennathur; Jonathan Troost

*Temple University, Philadelphia, PA*: Crystal Gadegbeku

*St. Clair Nephrology Research, Detroit, MI:* Keith Bellovich

*Wayne State University, Detroit, MI:* Zeenat Bhat

*Levine Children’s Hospital, Charlotte, NC:* Susan Massengill (Pediatric Nephrology)

*JH Stroger Hospital, Chicago, IL:* Kalyani Perumal
